# Supplementary material for: Anin silicoinvestigation of the binding modes and pathway of APTO-253 on c-KIT G-quadruplex DNA
Source: Royal Society of Chemistry journal article supplement (doi:10.1039/d0cp05210h), 2021-01-01
Supplement: d0cp05210h1.pdf [file d0cp05210h1.pdf]

## Supplementary Information

### An in Silico Investigation of Binding Modes and Pathway of APTO-253 on c-KIT G-Quadruplex DNA

Saikat Pal and Sandip Paul\*

*Department of Chemistry, Indian Institute of Technology, Guwahati Assam, India-781039*

(Dated: November 30, 2020)

| <b>Disease Type</b> | <b>Cell Lines</b> | <b>IC<sub>50</sub>(<math>\mu</math>M) Mean</b> |
|---------------------|-------------------|------------------------------------------------|
| MCL                 | Jeko-1            | 0.057                                          |
| MCL                 | GRANTA-519        | 0.082                                          |
| Burkitt's           | Raji              | 0.1                                            |
| AML                 | MOLM-13           | 0.14                                           |
| MCL                 | Mino              | 0.23                                           |
| AML                 | MV4-11            | 0.24                                           |
| AML                 | EOL-1             | 0.3                                            |
| AML                 | THP1              | 0.34                                           |
| Burkitt's           | Ramos             | 0.35                                           |
| AML                 | HL-60             | 0.46                                           |
| AML                 | SKM-1             | 0.48                                           |
| AML                 | KG-1              | 0.51                                           |
| DLBCL               | SUDHL-6           | 0.51                                           |
| T-ALL               | Jurkat            | 0.52                                           |
| AML                 | Nomo-1            | 1.45                                           |
| AML                 | HEL92.1.7         | 1.75                                           |

TABLE S1: APTO-253 IC<sub>50</sub> values in leukemia and lymphoma cell lines.

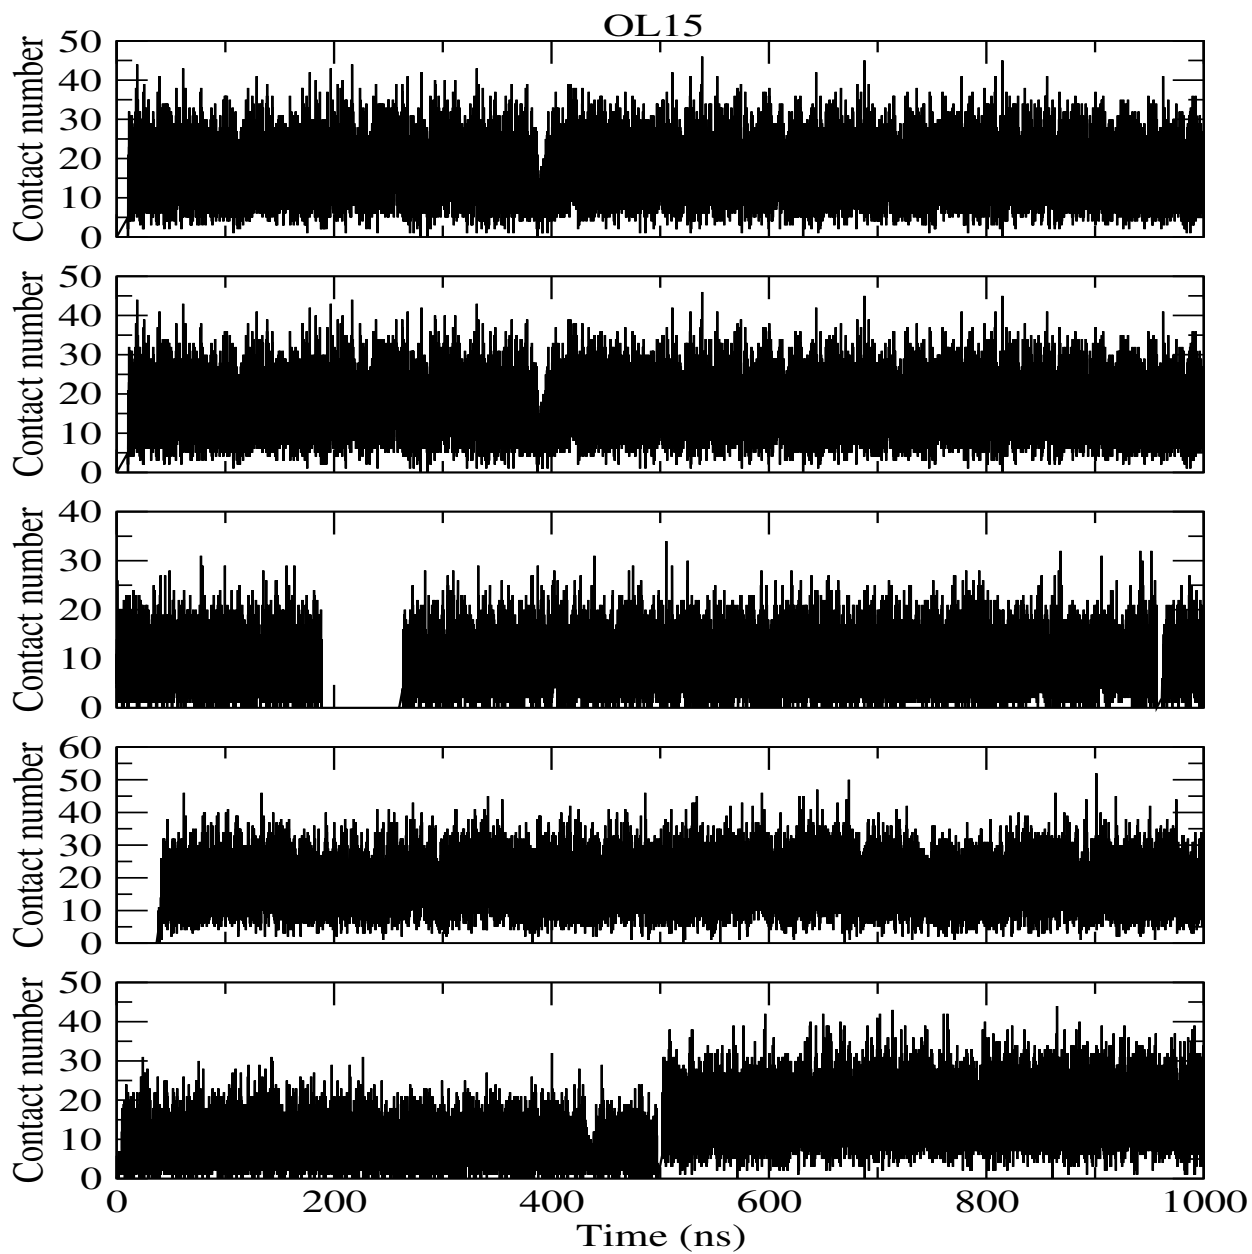

FIG. S1: Contact number between APTO-253 and c-KIT quadruplex DNA for different systems.

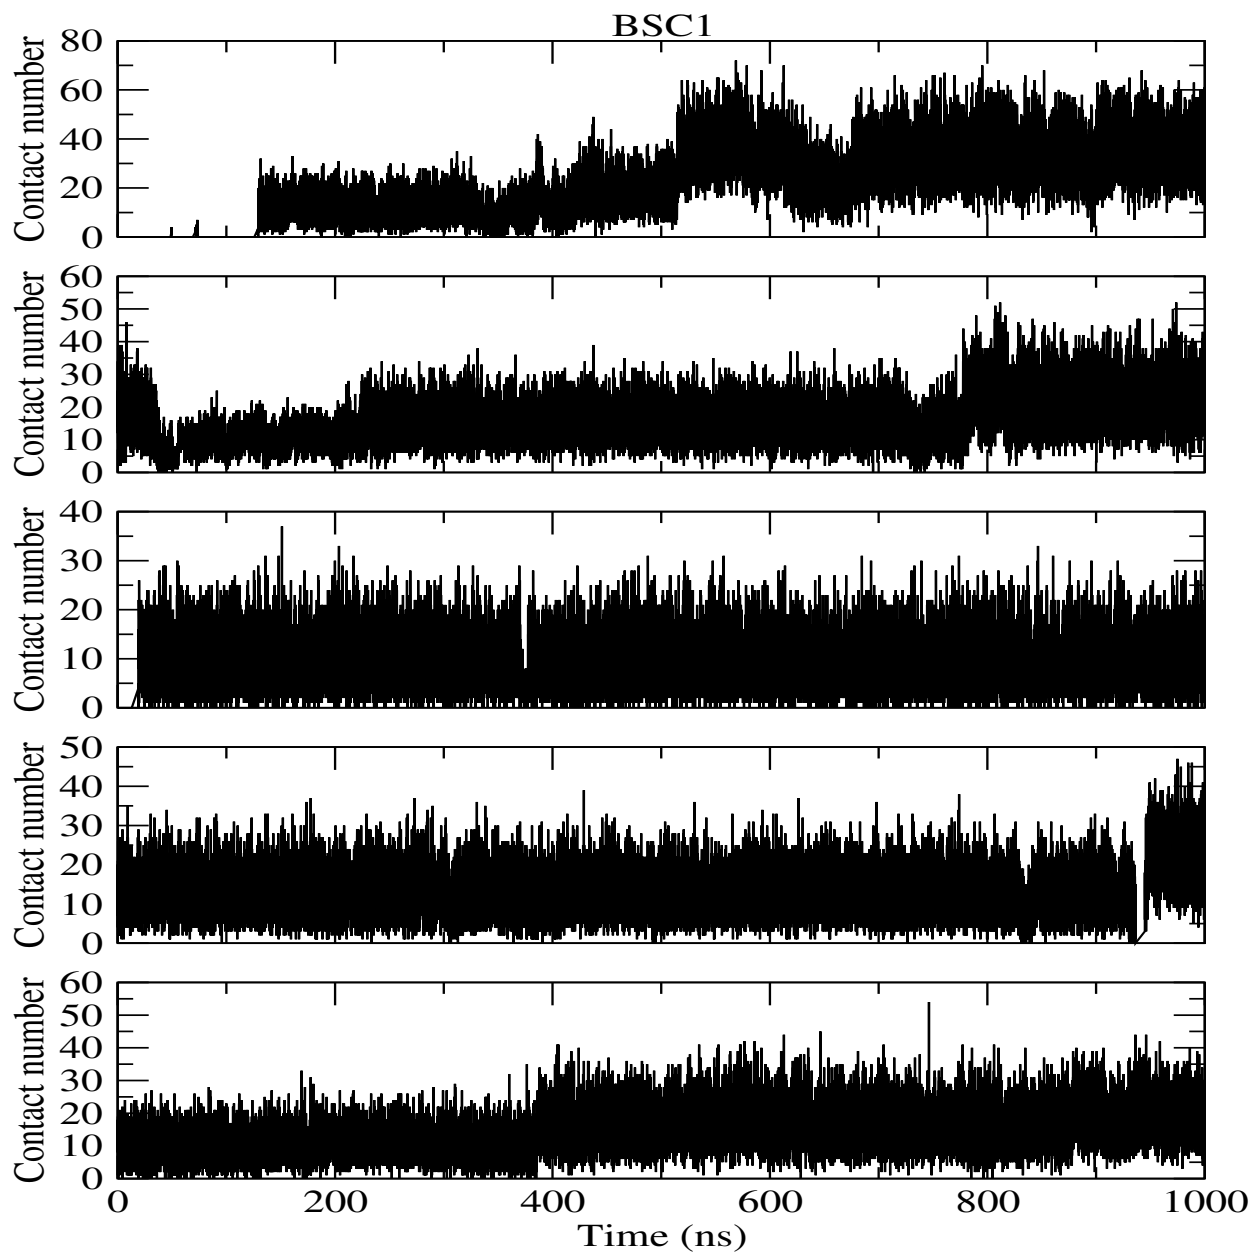

FIG. S2: Contact number between APTO-253 and c-KIT quadruplex DNA for different systems.

OL15-Top (a)

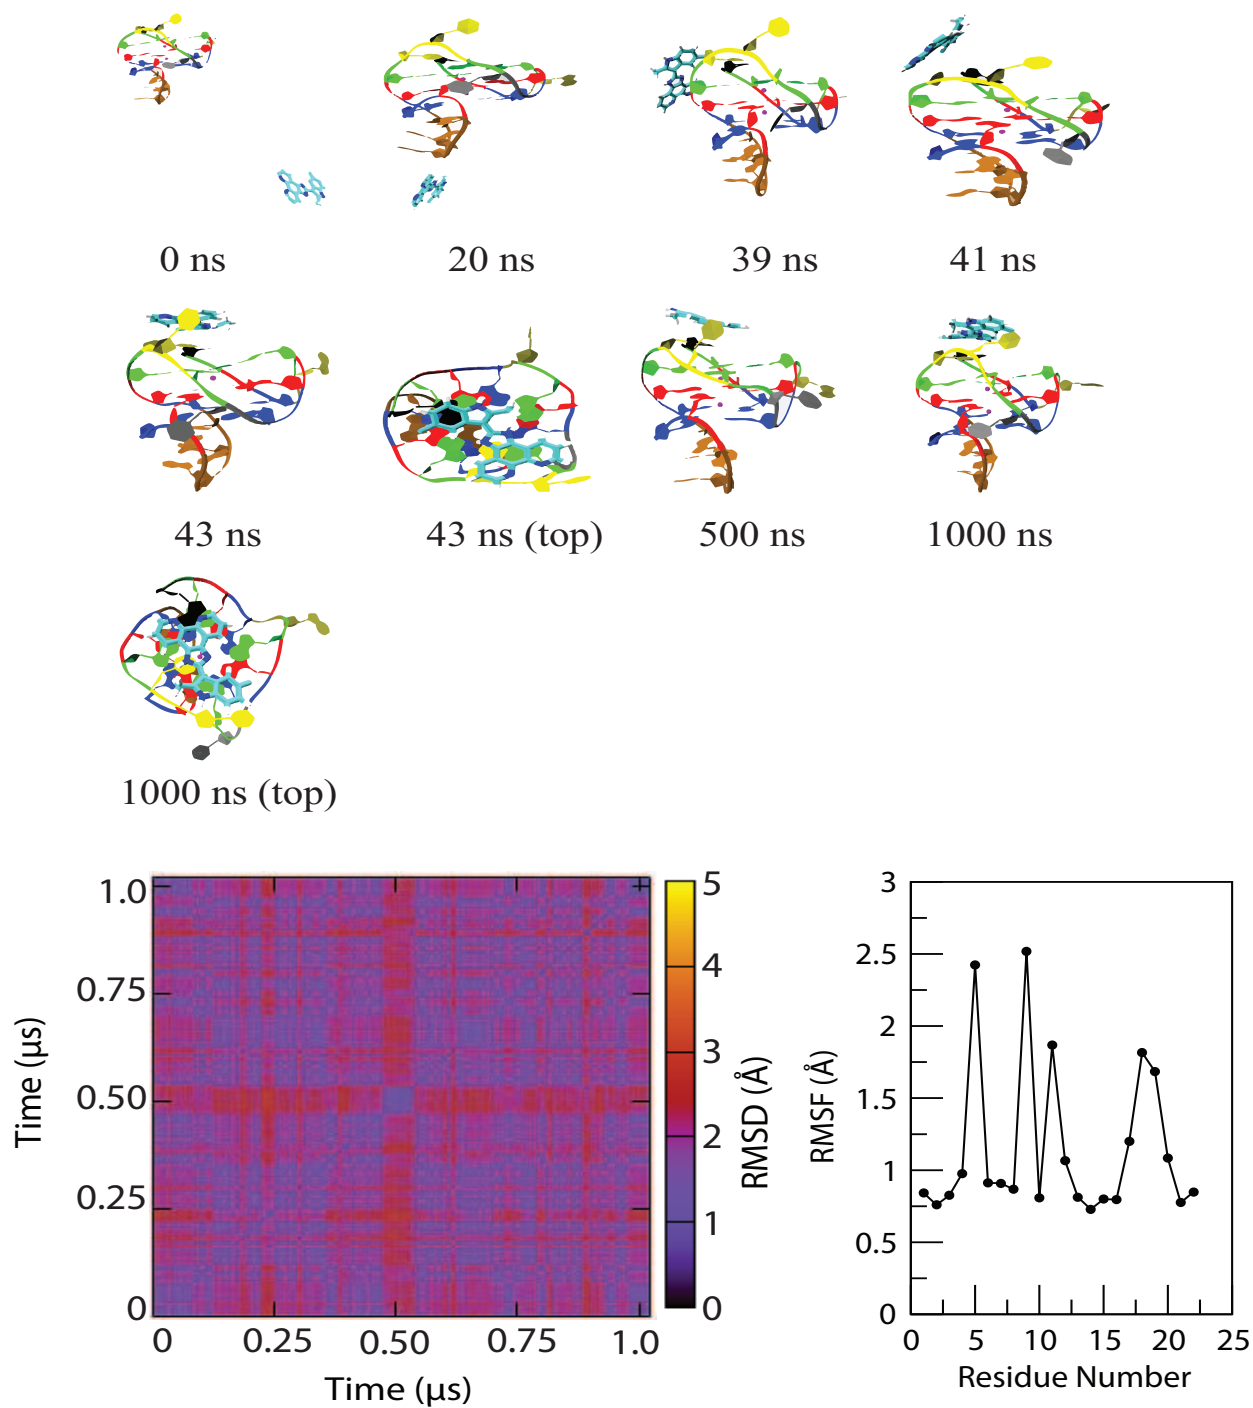

FIG. S3: (a) Snapshots representations of the complex formation of the c-KIT quadruplex DNA with time progress, (b) taking into account all heavy atoms of c-KIT G-quadruplex DNA, pairwise 2D-RMSDs of different systems, and (c) Root-mean-square fluctuations (RMSFs) of all heavy atom of c-KIT G-quadruplex DNA for different systems.

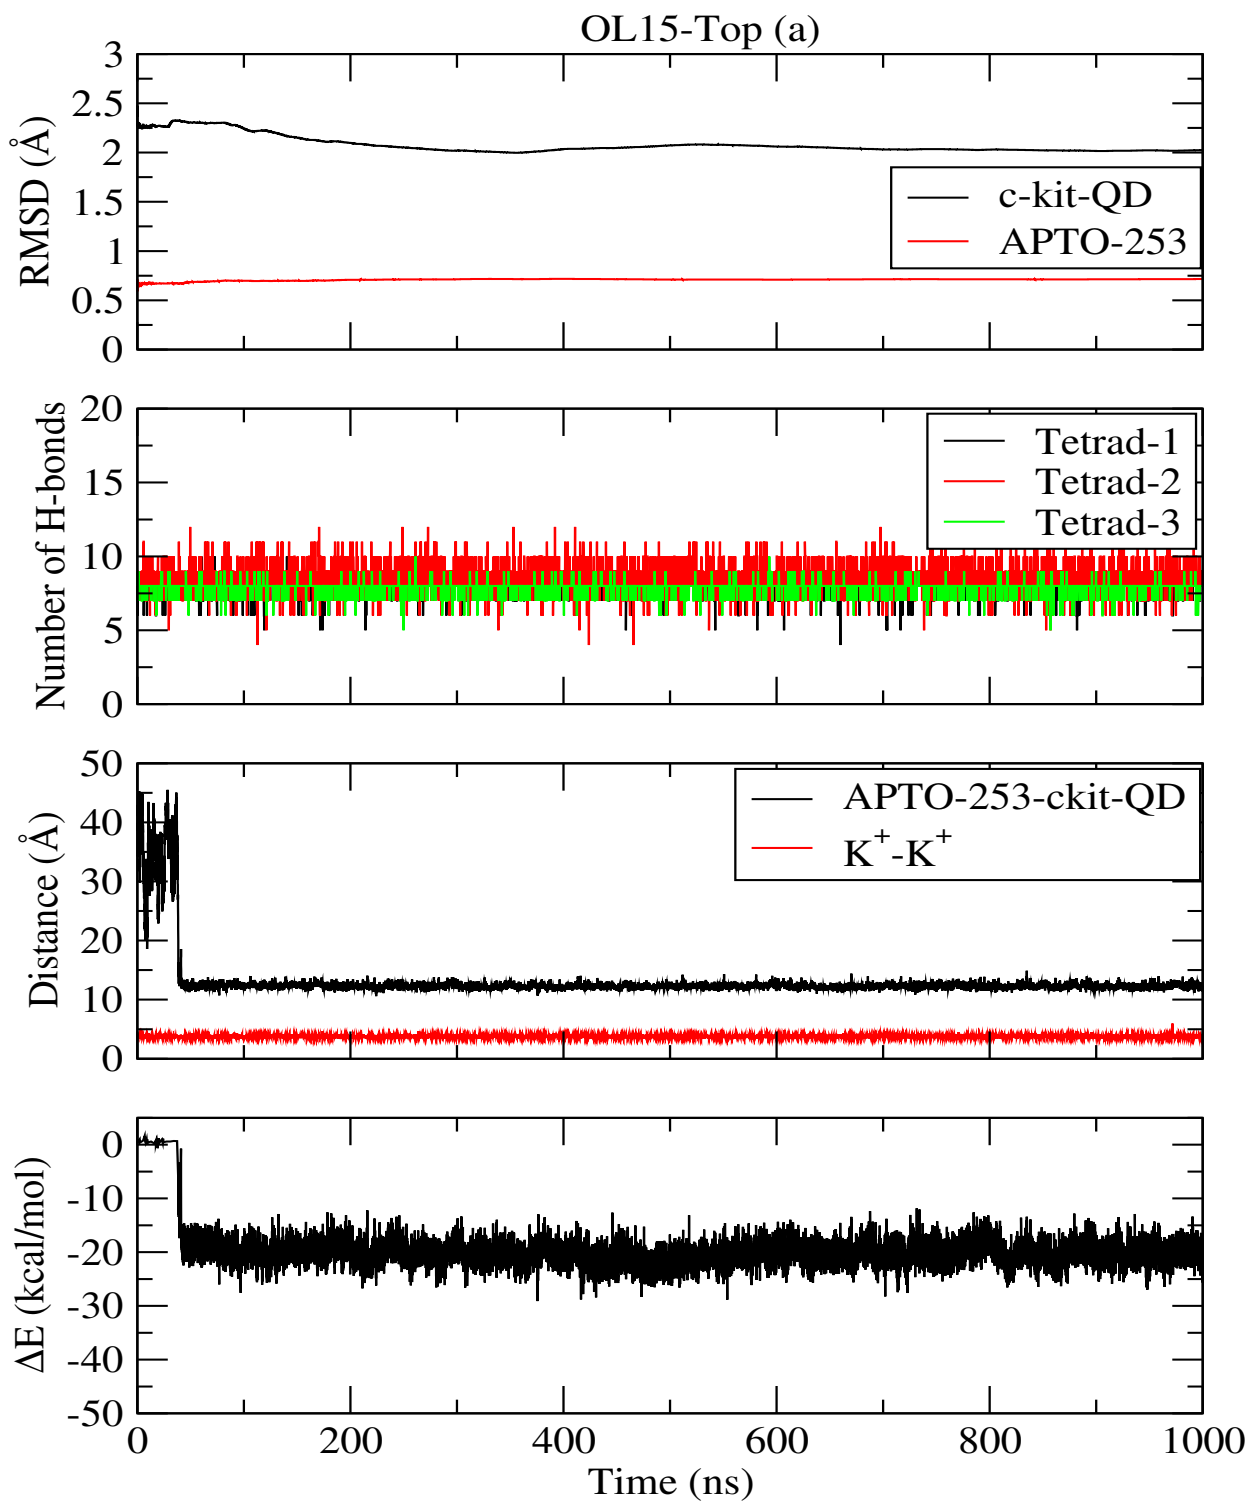

FIG. S4: (a) Time progression of the root-mean-square deviations (RMSDs) of all heavy atom of c-KIT G-quadruplex DNA, (b) number of hydrogen bonds for tetrads, (c) the distance between center of masses of c-KIT G-quadruplex DNA and APTO-253, and the distance between the two  $K^+$  central cations, and (d) the binding free energy of complex formation of APTO-253 ligand and c-KIT G-quadruplex DNA with time progression.

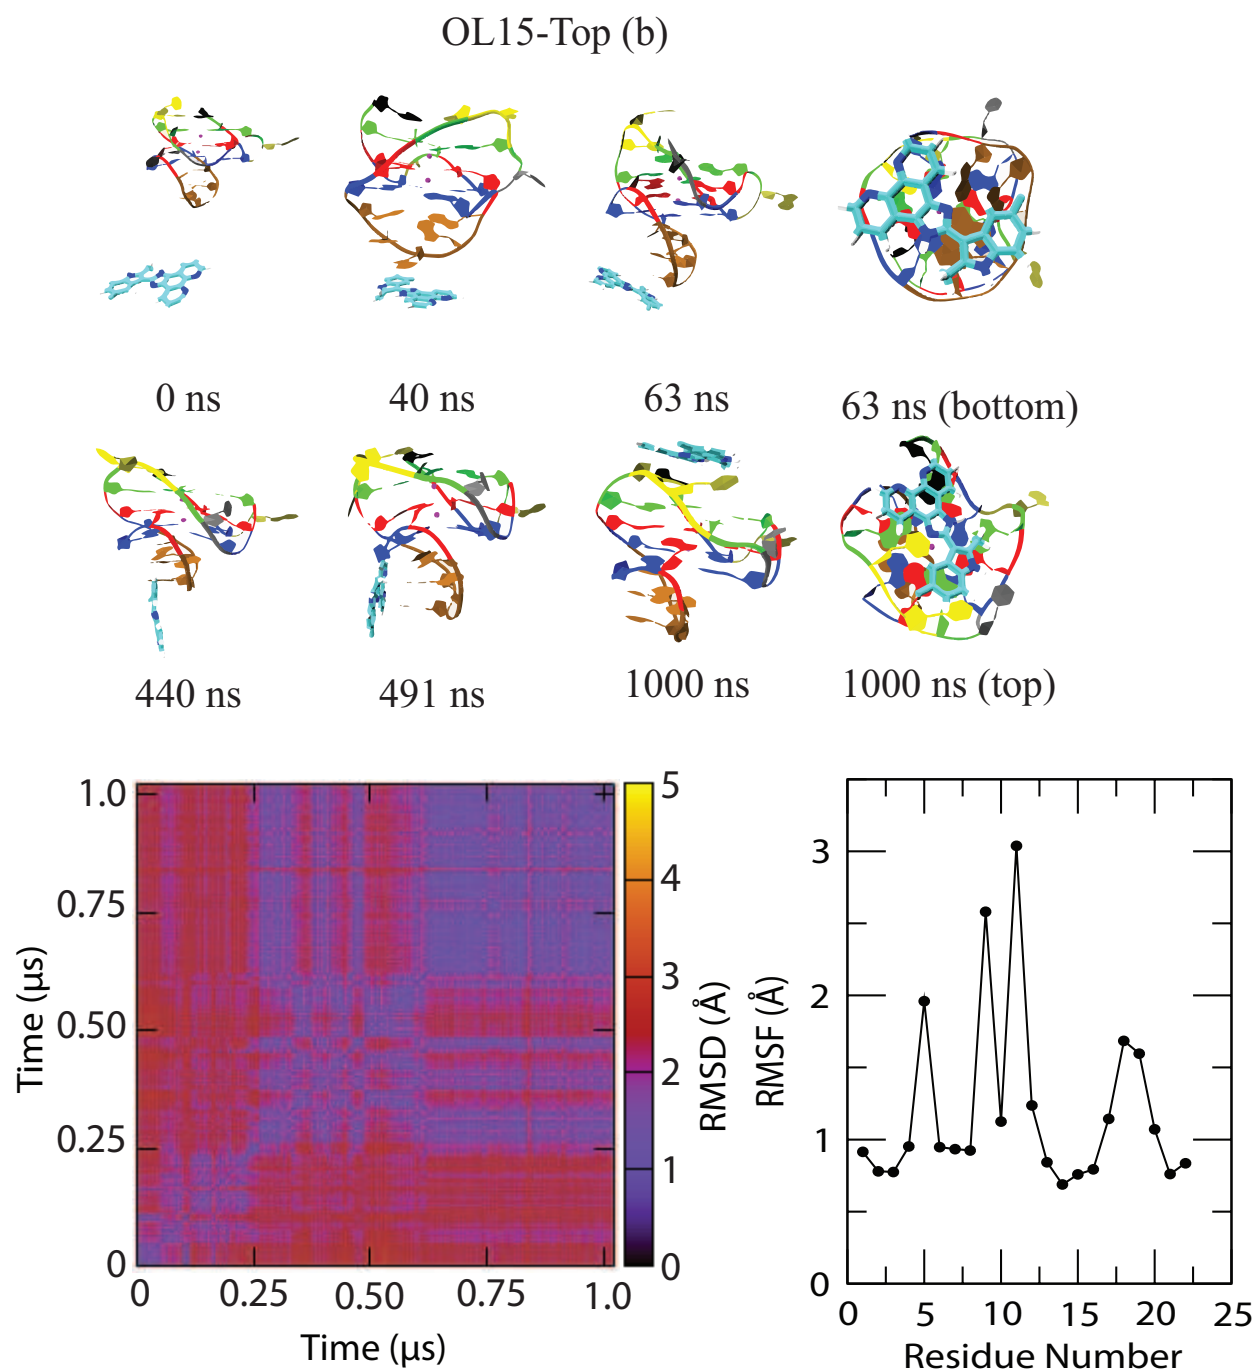

FIG. S5: (a) Snapshots representations of the complex formation of the c-KIT quadruplex DNA with time progress, (b) taking into account all heavy atoms of c-KIT G-quadruplex DNA, pairwise 2D-RMSDs of different systems, and (c) Root-mean-square fluctuations (RMSFs) of all heavy atom of c-KIT G-quadruplex DNA for different systems.

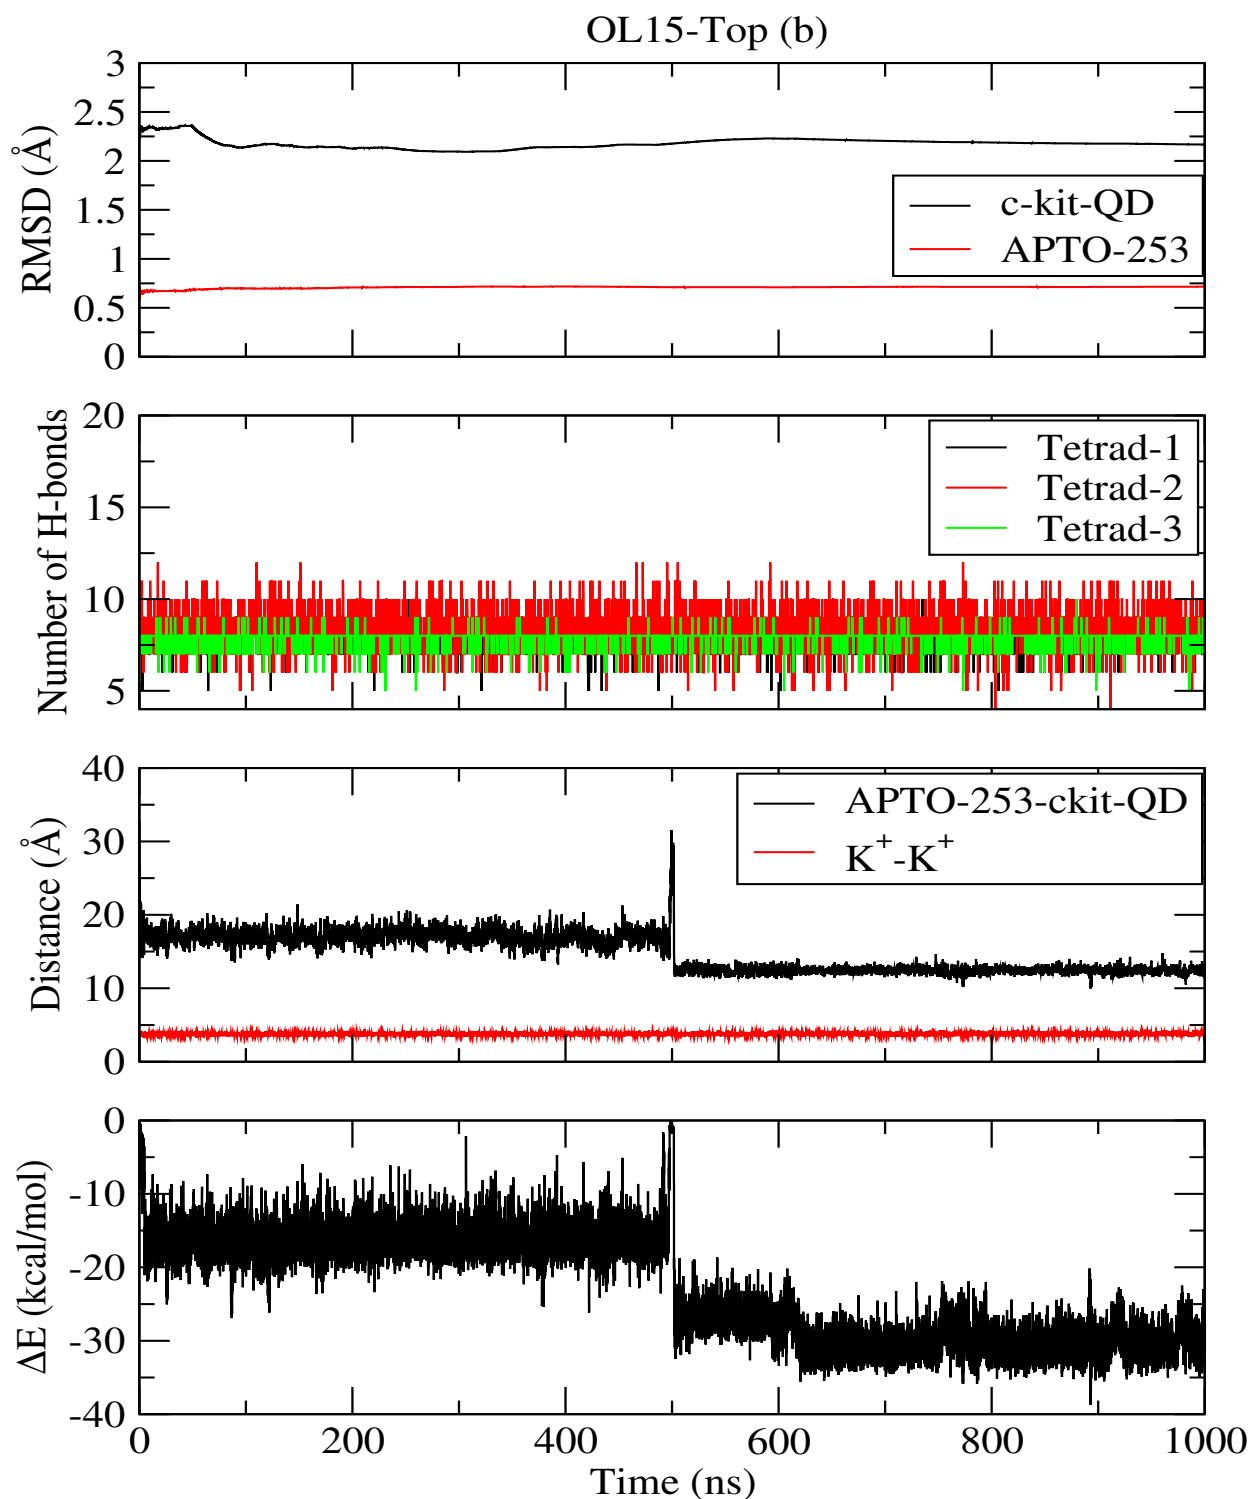

FIG. S6: (a) Time progression of the root-mean-square deviations (RMSDs) of all heavy atom of c-KIT G-quadruplex DNA, (b) number of hydrogen bonds for tetrads, (c) the distance between center of masses of c-KIT G-quadruplex DNA and APTO-253, and the distance between the two K<sup>+</sup> central cations, and (d) the binding free energy of complex formation of APTO-253 ligand and c-KIT G-quadruplex DNA with time progression.



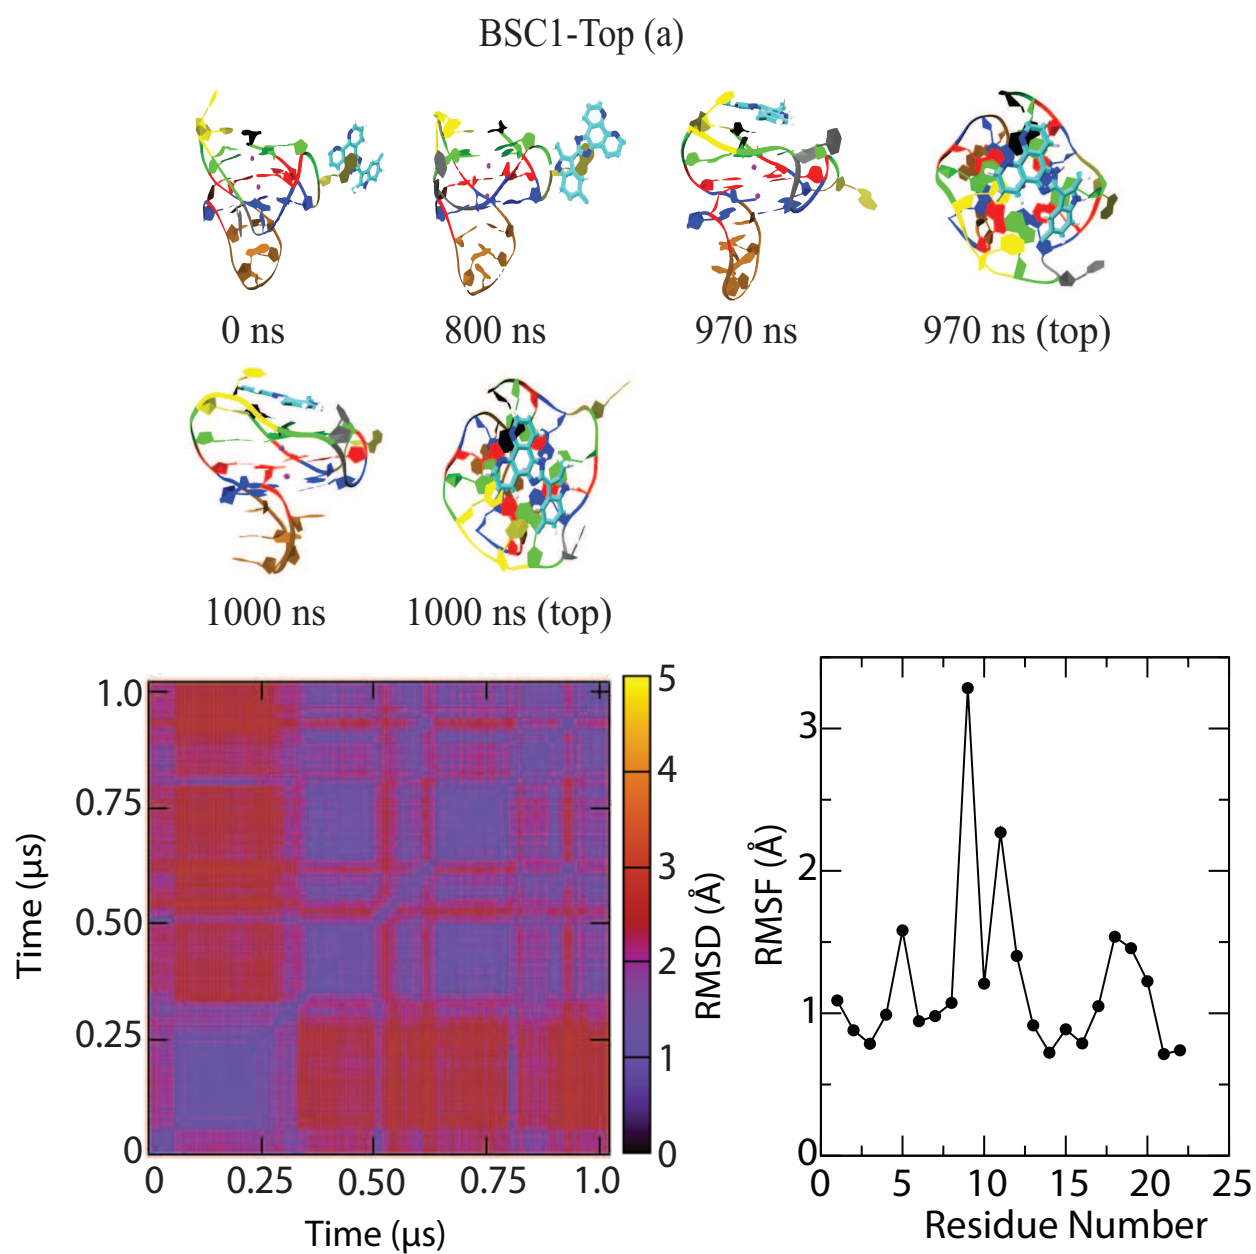

FIG. S7: (a) Snapshots representations of the complex formation of the c-KIT quadruplex DNA with time progress, (b) taking into account all heavy atoms of c-KIT G-quadruplex DNA, pairwise 2D-RMSDs of different systems, and (c) Root-mean-square fluctuations (RMSFs) of all heavy atom of c-KIT G-quadruplex DNA for different systems.

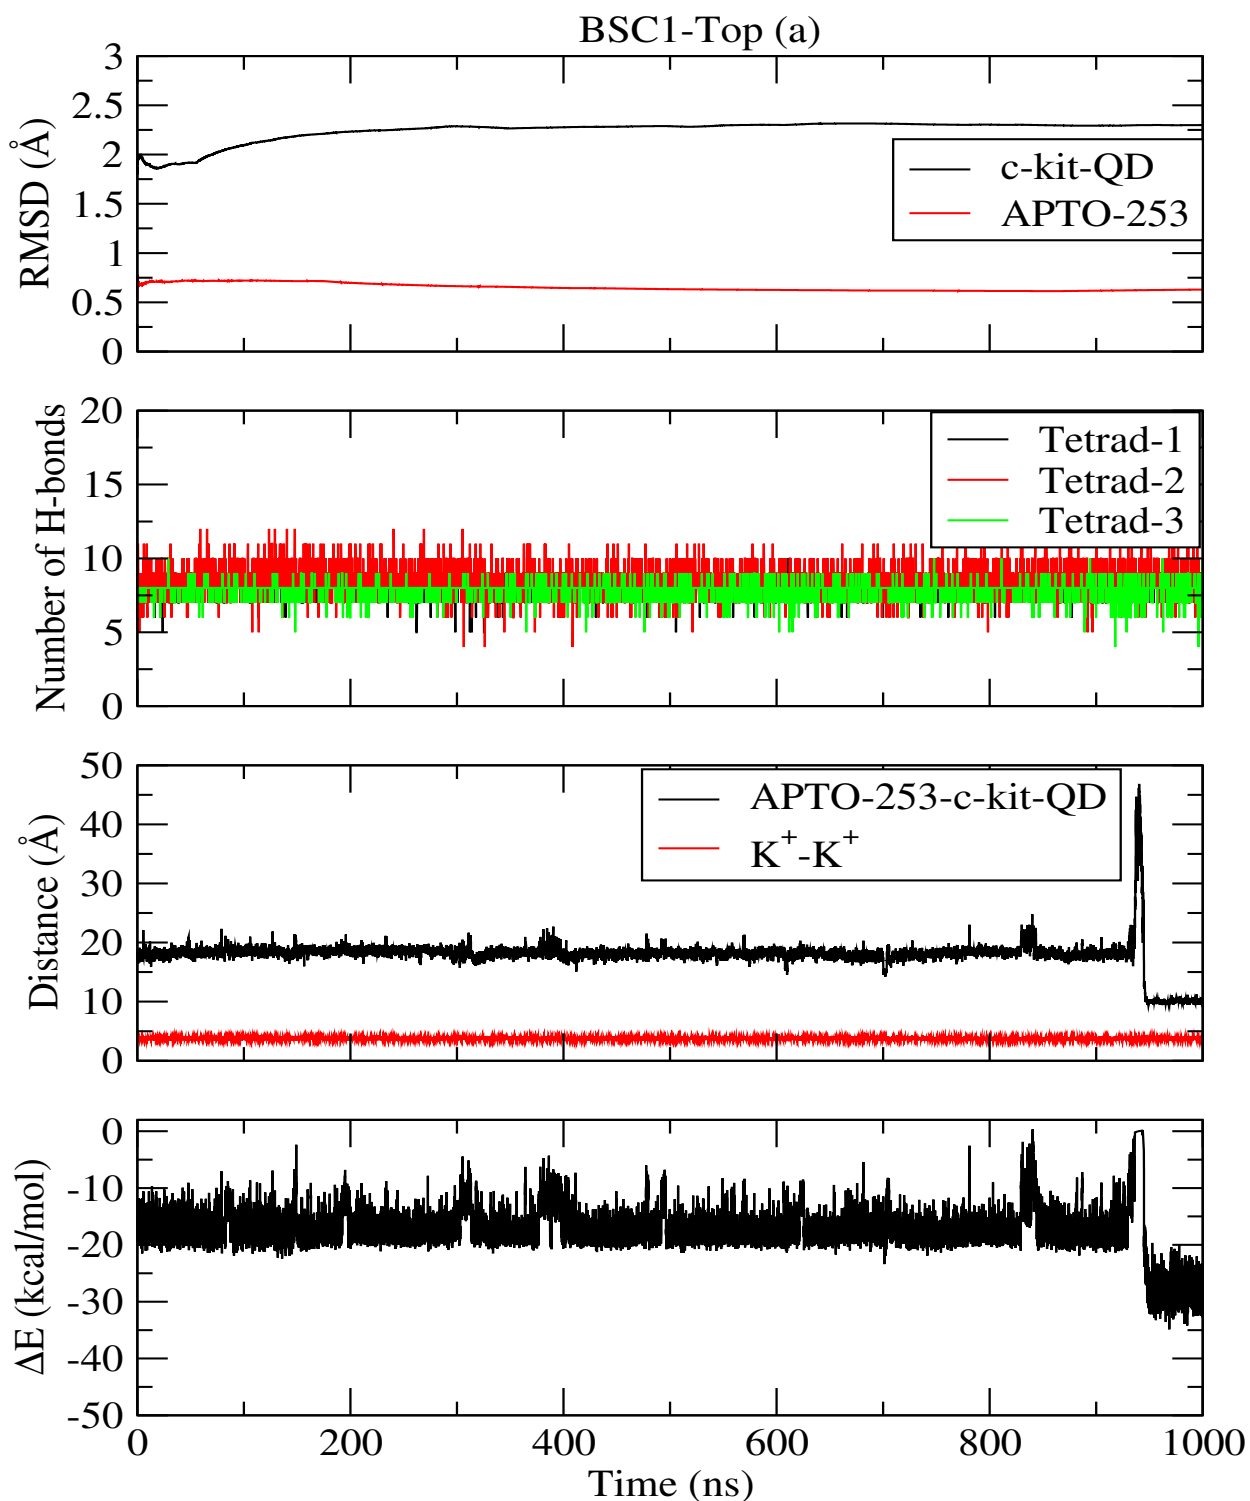

FIG. S8: (a) Time progression of the root-mean-square deviations (RMSDs) of all heavy atom of c-KIT G-quadruplex DNA, (b) number of hydrogen bonds for tetrads, (c) the distance between center of masses of c-KIT G-quadruplex DNA and APTO-253, and the distance between the two K<sup>+</sup> central cations, and (d) the binding free energy of complex formation of APTO-253 ligand and c-KIT G-quadruplex DNA with time progression.

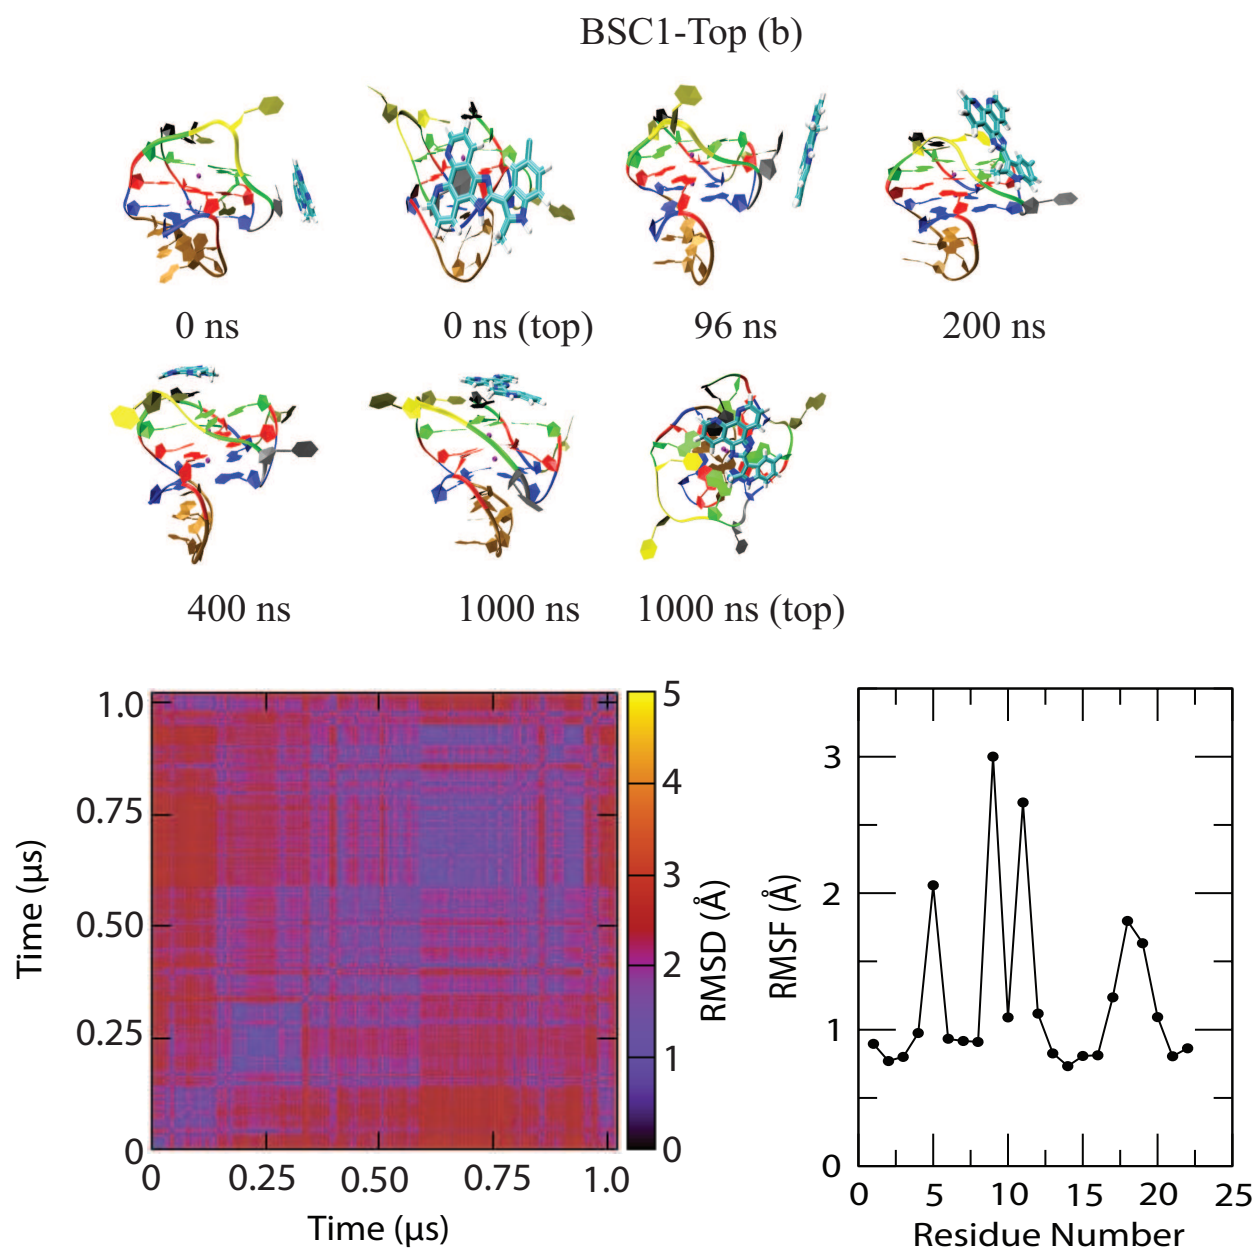

FIG. S9: (a) Snapshots representations of the complex formation of the c-KIT quadruplex DNA with time progress, (b) taking into account all heavy atoms of c-KIT G-quadruplex DNA, pairwise 2D-RMSDs of different systems, and (c) Root-mean-square fluctuations (RMSFs) of all heavy atom of c-KIT G-quadruplex DNA for different systems.

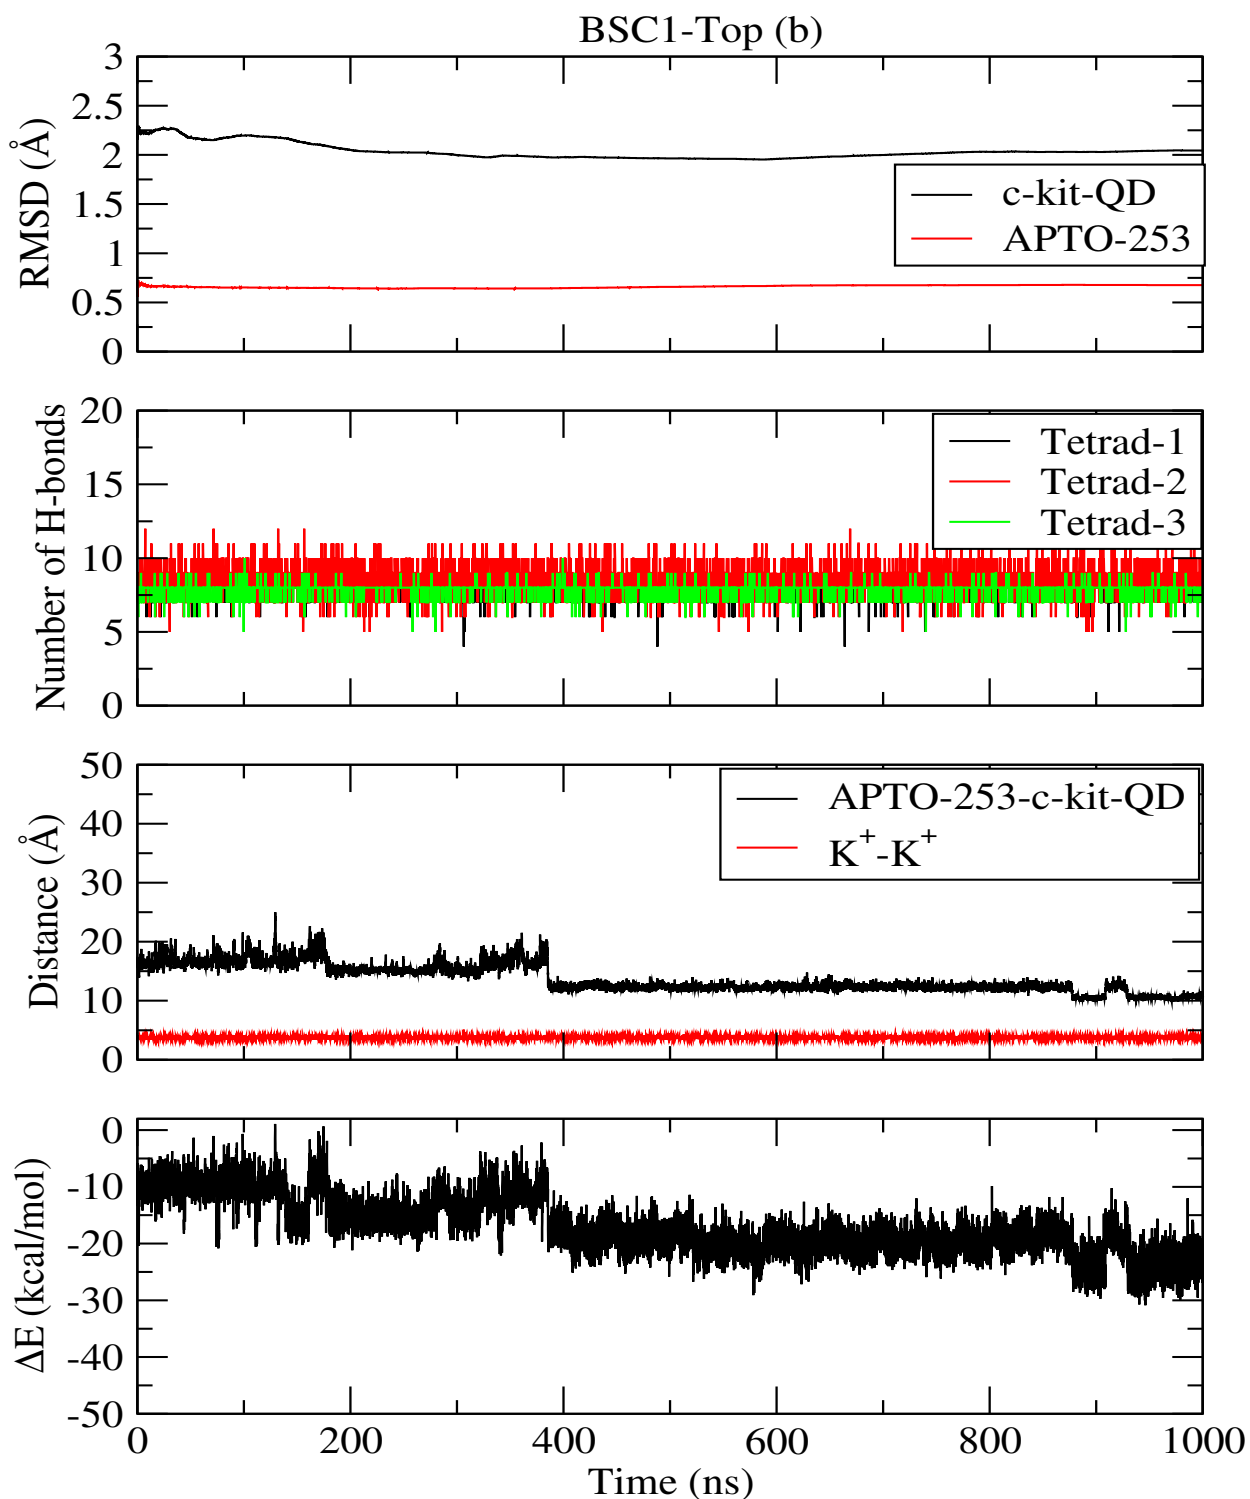

FIG. S10: (a) Time progression of the root-mean-square deviations (RMSDs) of all heavy atom of c-KIT G-quadruplex DNA, (b) number of hydrogen bonds for tetrads, (c) the distance between center of masses of c-KIT G-quadruplex DNA and APTO-253, and the distance between the two K<sup>+</sup> central cations, and (d) the binding free energy of complex formation of APTO-253 ligand and c-KIT G-quadruplex DNA with time progression.

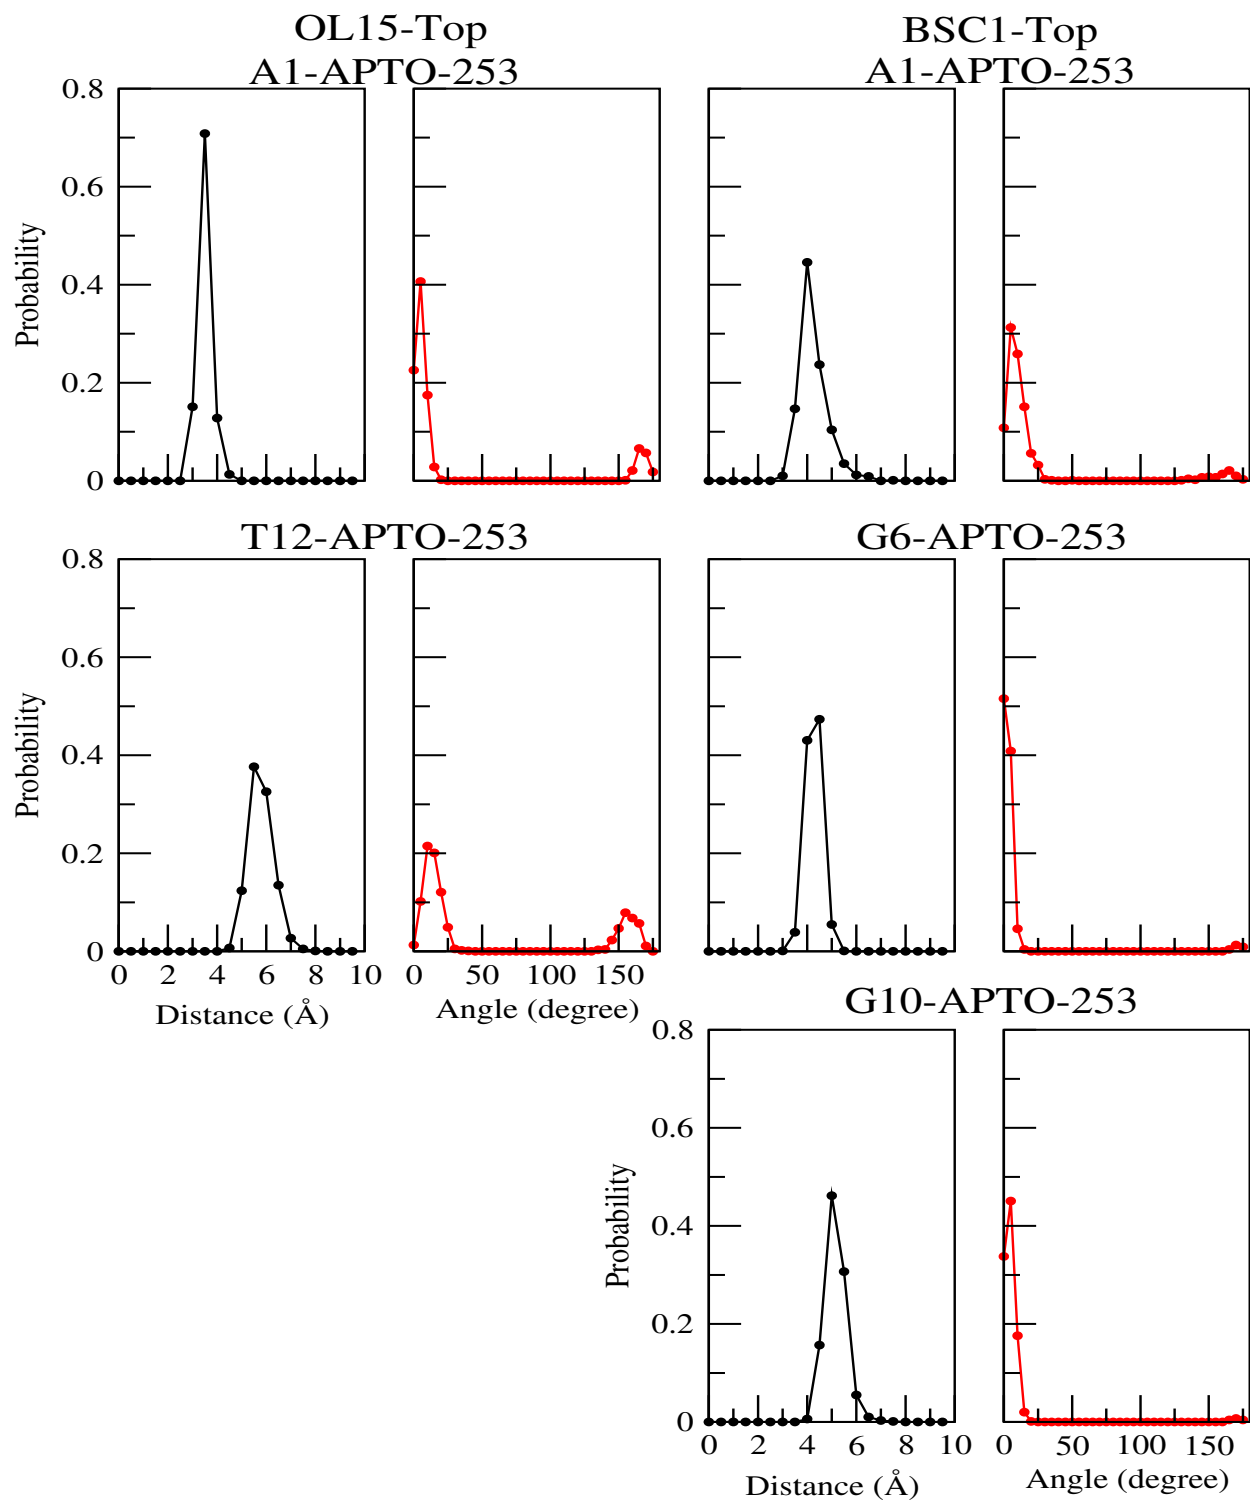

FIG. S11: Stacking probability with respect to distance and angle between the corresponding planes.

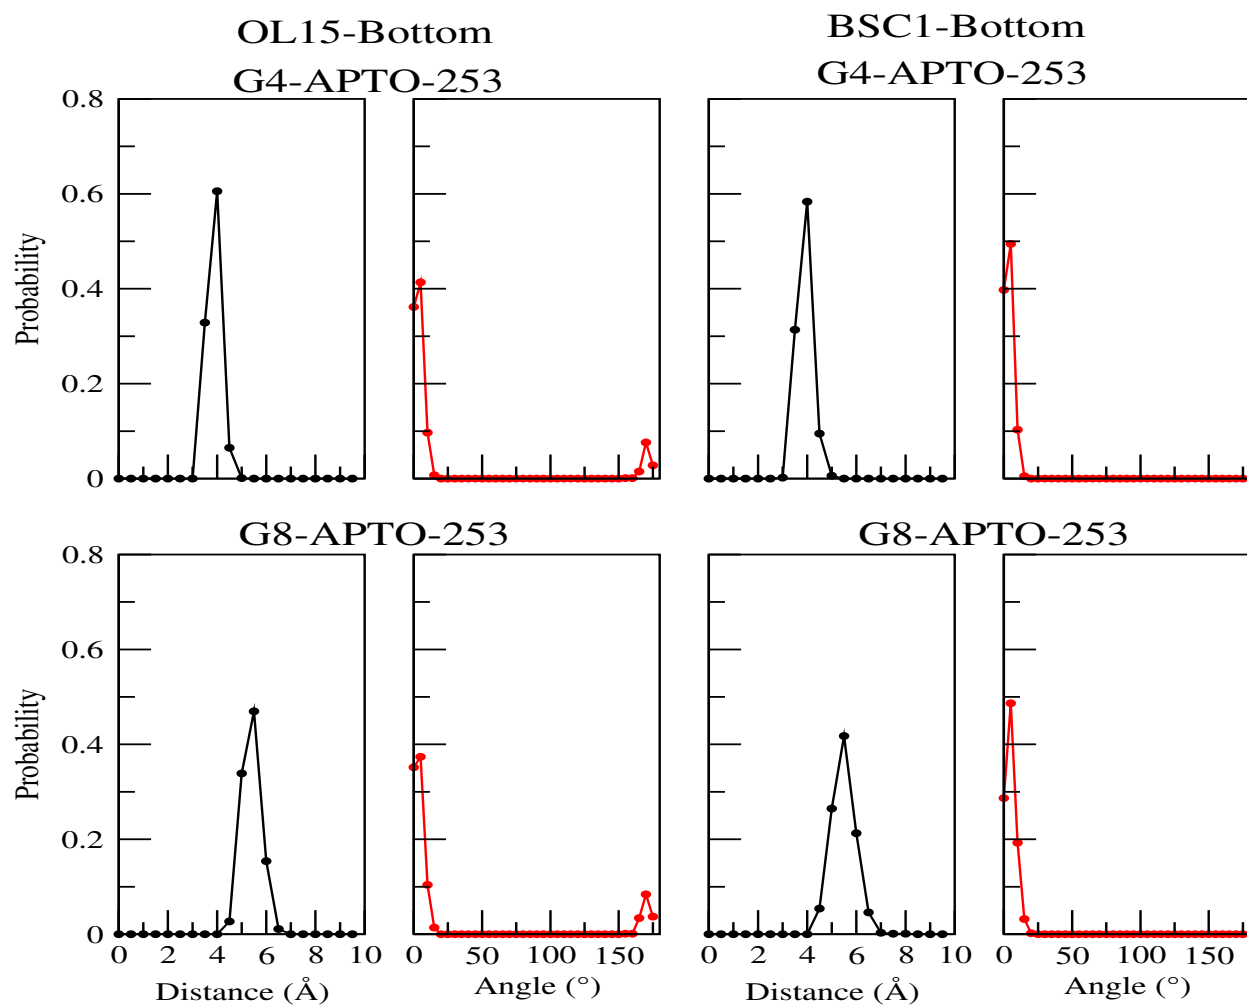

FIG. S12: Stacking probability with respect to distance and angle between the corresponding planes.

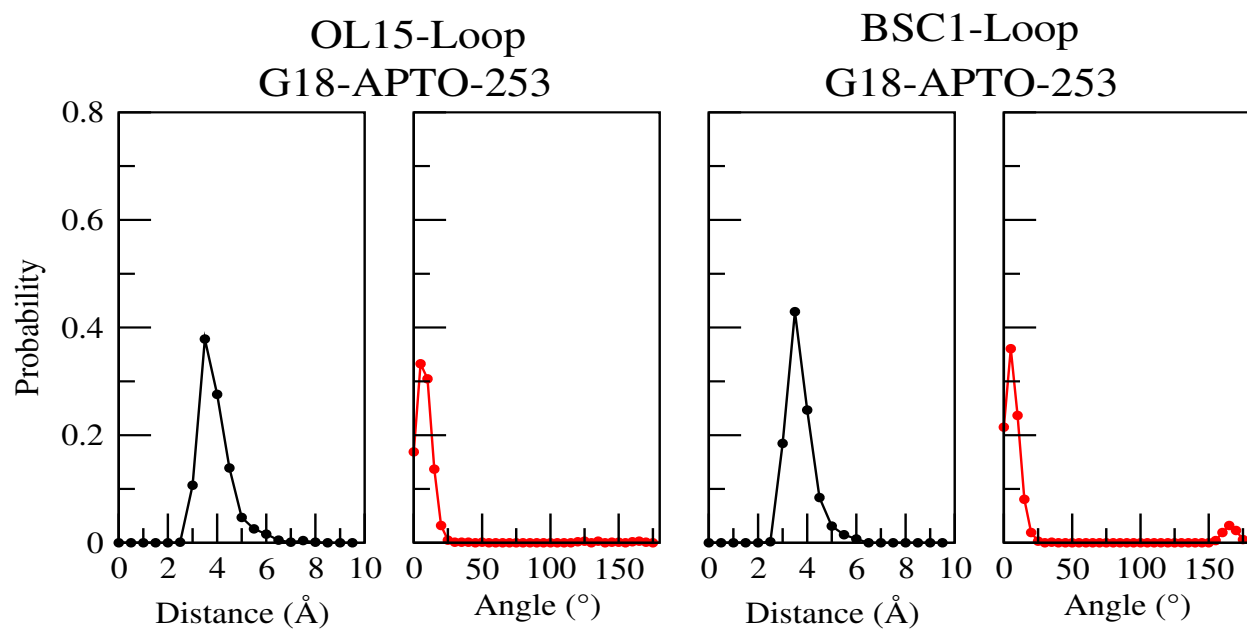

FIG. S13: Stacking probability with respect to distance and angle between the corresponding planes.

---

\* Electronic address: [sandipp@iitg.ac.in](mailto:sandipp@iitg.ac.in)
